# Supplementary material for: Baroclinic and barotropic instabilities in planetary atmospheres - energetics,equilibration and adjustment
Source: Copernicus journal article supplement (doi:10.5194/npg-2019-53), 2019-10-15
Supplement: Supplementary file [file npg-2019-53-EC1-supplement.pdf]

*The line numbers below are those of the version I have had access to, once printed. For some reason, the numbers seem to be shifted by one or two units from the ones on the version I visualize on my screen.*

1. Eq. (1). An integral sign (from 0 to  $H$  I presume) is missing for the integral with respect to  $z$  on the left-hand side of the equation. And it might be useful to specify at this stage that  $y$  is the latitudinal coordinate and  $z$  the vertical coordinate.
2. There seems to be an inconsistency as concerns the values of the thermal Rossby number  $Ro_T$ . The text (starting l. 388) says that the eddy meridional heat transport peaks at  $Ro_T \sim 0.07$ , while Fig. 11(a) shows a peak at  $Ro_T \sim 0.3$  (see also Table 1, and ll. 724-730 and 748-751).
3. Fig. 3(c). There are two curves on the figure. What is the difference between them ?
4. Ll. 444-445, ... *leads to a value of  $\mathcal{T}_R$  which is much larger than  $O(1)$  but not hugely so, ....* Well, the value given in Table 2 is  $1.3 \times 10^5$ .
5. Ll. 710-711, ... *to infer the existence of a unique reference frame on each planet ...* A unique reference frame with which properties ?
6. Ll. 461-462, ... *the observed near suppression of baroclinic instability in Martian summers ....* It would be better to give appropriate reference(s).
7. Fig. 6. What is the precise connection between the vertical coordinate (*Stability parameter*) and the thermal Rossby number ?
8. Fig. 8. Inset. It would be preferable to say explicitly that that  $Pe$  refers to heat transport by the axisymmetric flow,  $Pxs$  to transport by the eddies, and  $m$  to the number of longitudinal waves.
9. L. 100, ... *for comparison, in Section 4, with the known properties ...*
10. Eq. (15) Inconsistency of notation.  $\theta$  or  $\bar{\theta}$  with overbar ?
11. Ll. 418-419, ... *the values of  $\mathcal{B}u$ ,  $Ro_T$  and  $\mathcal{T}_R$  [...], based on Eqs (12-14)*
12. Ll. 780-781. Contrary to what the text implies, Table 2 does not mention values for Saturn.
13. Fig. 10, caption, and l. 382. What is PUMA-S with respect to PUMA, introduced earlier ?
14. It would be preferable to define the Burger number when it is first introduced (l. 241) rather than later on (Eq. 13).
15. L. 125. Say that  $u^*$  and  $v^*$  are perturbations with respect to zonal mean, and that the overbar denotes a longitudinal mean.

16. Table 1 does not seem to be referenced in the text. It could be on l. 363, after mention of the range of variation of  $\Omega^*$ .
17. L. 350,  $\Delta\theta_{EP} \rightarrow \Delta\theta_{EP}$
18. Caption of Table 2. Expand *PDS* (*Planetary Data System*)
19. L. 64, ... *quasi-geostrophic potential vorticity* (***QGPV***), ...
20. L. 468, expand *LMD* (*Laboratoire de Météorologie Dynamique*)
21. L. 451, ... *tilt with* ***altitude***.
22. L. 141, ... yet ***it*** is observed ...
23. L. 114, ... *stability criterion* (*i*) (parentheses, a similar correction is to be made in other places, please check)
